# Supplementary material for: Functional Therapeutic Target Validation Using Pediatric Zebrafish Xenograft Models
Source: MDPI journal article supplement (doi:10.3390/cancers14030849), 2022-02-08
Supplement: s1 [file s1]

## Supplementary Materials:

# Functional Therapeutic Target Validation Using Pediatric Zebrafish Xenograft Models

Charlotte Gatzweiler <sup>1,2,3</sup>, Johannes Ridinger <sup>1,2</sup>, Sonja Herter <sup>1,2,4</sup>, Xenia F. Gerloff <sup>1,2,4</sup>, Dina ElHarouni <sup>1,4,9,10</sup>, Yannick Berker <sup>1,2</sup>, Roland Imle <sup>4,11,17</sup>, Lukas Schmitt <sup>11</sup>, Sina Kreth <sup>12</sup>, Sabine Stainczyk <sup>12</sup>, Simay Ayhan <sup>1,2,4,5</sup>, Sara Najafi <sup>1,2,5</sup>, Damir Krunic <sup>6</sup>, Karen Frese <sup>7</sup>, Benjamin Meder <sup>7,8</sup>, David Reuss<sup>13</sup>, Petra Fiesel <sup>1,14</sup>, Kathrin Schramm <sup>1,15,16</sup>, Mirjam Blattner-Johnson <sup>1,15,16</sup>, David T.W. Jones <sup>1,15,16</sup>, Ana Banito <sup>1,11</sup>, Frank Westermann <sup>1,12</sup>, Sina Oppermann <sup>1,2</sup>, Till Milde <sup>1,2,5</sup>, Heike Peterziel <sup>1,2</sup>, Olaf Witt <sup>1,2,5</sup> and Ina Oehme <sup>1,2\*</sup>

<sup>1</sup> Hopp Children's Cancer Center Heidelberg (KiTZ), 69120 Heidelberg, Germany

<sup>2</sup> Clinical Cooperation Unit Pediatric Oncology, German Cancer Research Center (DKFZ) and German Cancer Consortium (DKTK), 69120 Heidelberg, Germany

<sup>3</sup> Faculty of Medicine, Heidelberg University, 69120 Heidelberg, Germany

<sup>4</sup> Faculty of Biosciences, Heidelberg University, 69120 Heidelberg, Germany

<sup>5</sup> Department of Pediatric Oncology, Hematology and Immunology, Heidelberg University Hospital, 69120 Heidelberg, Germany

<sup>6</sup> Light Microscopy Facility, German Cancer Research Center (DKFZ), 69120 Heidelberg, Germany

<sup>7</sup> Institute for Cardiomyopathies Heidelberg, Heidelberg University, 69120 Heidelberg, Germany;

karen.frese@med.uni-heidelberg.de (K.F.); Benjamin.Meder@med.uni-heidelberg.de (B.M.)

<sup>8</sup> Genome Technology Center, Stanford University, Stanford, CA 94304, USA

<sup>9</sup> Bioinformatics and Omics Data Analytics, German Cancer Research Center (DKFZ), 69120 Heidelberg, Germany

<sup>10</sup> Division of Pediatric Neurooncology, German Cancer Research Center (DKFZ) and

German Cancer Consortium (DKTK), 69120 Heidelberg, Germany.

<sup>11</sup> Pediatric Soft Tissue Sarcoma Research Group, German Cancer Research Center (DKFZ), 69120 Heidelberg, Germany

<sup>12</sup> Division of Neuroblastoma Genomics, German Cancer Research Center (DKFZ), 69120 Heidelberg, Germany

<sup>13</sup> Department Neuropathology at Institute of Pathology, Heidelberg University Hospital, 69120 Heidelberg, Germany

<sup>14</sup> Clinical Cooperation Unit Neuropathology, German Cancer Research Center (DKFZ), 69120 Heidelberg, Germany

<sup>15</sup> National Center for Tumor Diseases (NCT) Network, 69120 Heidelberg, Germany

<sup>16</sup> Division of Pediatric Glioma Research, German Cancer Research Center (DKFZ) and German Cancer Consortium (DKTK), 69120 Heidelberg, Germany

<sup>17</sup> Division of Pediatric Surgery, Department of General, Visceral and Transplantation Surgery, University Hospital Heidelberg, 69120 Heidelberg, Germany

\* Correspondence: i.oehme@kitz-heidelberg.de

All drugs detected in at least one of the culture models of the rhabdoid tumor sample INF\_R\_1288\_r1 as a TOP25 hit are listed in **Table S1**. For each model it is noted, whether the drug was within the TOP25 hits (yes) or not (no). For the INF\_R\_1288\_r1-derived models, 13 drugs overlapped in all three models.

**Table S1. TOP25 Drug Hits for INF\_R\_1288\_r1**

| Drug name                       | TOP25 FTC | TOP25 LTC | TOP25 mPDX-C |
|---------------------------------|-----------|-----------|--------------|
| AMG-232                         | yes       | yes       | yes          |
| bortezomib                      | yes       | yes       | yes          |
| cytarabine                      | yes       | yes       | yes          |
| dactinomycin                    | yes       | yes       | yes          |
| daunorubicin                    | yes       | yes       | yes          |
| idasanutlin                     | yes       | yes       | yes          |
| panobinostat                    | yes       | yes       | yes          |
| ponatinib                       | yes       | yes       | yes          |
| selinexor                       | yes       | yes       | yes          |
| staurosporine_drug <sup>1</sup> | yes       | yes       | yes          |
| topotecan                       | yes       | yes       | yes          |
| trametinib                      | yes       | yes       | yes          |
| vinorelbine                     | yes       | yes       | yes          |
| A-1155463                       | yes       | yes       | no           |

|                       |     |     |     |
|-----------------------|-----|-----|-----|
| A-1210477             | yes | yes | no  |
| ceritinib             | yes | yes | no  |
| entinostat            | yes | yes | no  |
| navitoclax            | yes | yes | no  |
| A-1331852             | no  | yes | yes |
| doxorubicin           | no  | yes | yes |
| gemcitabine           | no  | yes | yes |
| mitoxantrone          | no  | yes | yes |
| crizotinib            | yes | no  | yes |
| vinblastine           | yes | no  | yes |
| vincristine           | yes | no  | yes |
| cisplatin             | yes | no  | no  |
| sunitinib             | yes | no  | no  |
| temsirolimus          | yes | no  | no  |
| vorinostat            | yes | no  | no  |
| cobimetinib           | no  | yes | no  |
| everolimus            | no  | yes | no  |
| thioguanine           | no  | yes | no  |
| axitinib              | no  | no  | yes |
| etoposide             | no  | no  | yes |
| methotrexate          | no  | no  | yes |
| paclitaxel            | no  | no  | yes |
| rapamycin (sirolimus) | no  | no  | yes |

<sup>1</sup> assay control

All drugs detected in at least one of the culture models of the eRMS tumor sample INF\_R\_1467\_r1 as a TOP25 hit are listed in **Table S2**. For each model it is noted, whether the drug was within the TOP25 hits (yes) or not (no). For the INF\_R\_1467\_r1-derived models, 16 drugs overlapped in all three models.

**Table S2. TOP25 Drug Hits for INF\_R\_1467\_r1**

| Drug name                       | TOP25 FTC | TOP25 LTC | TOP25 mPDX-C |
|---------------------------------|-----------|-----------|--------------|
| A-1155463                       | yes       | yes       | yes          |
| A-1210477                       | yes       | yes       | yes          |
| A-1331852                       | yes       | yes       | yes          |
| AMG-232                         | yes       | yes       | yes          |
| bortezomib                      | yes       | yes       | yes          |
| dactinomycin                    | yes       | yes       | yes          |
| everolimus                      | yes       | yes       | yes          |
| I-BET151                        | yes       | yes       | yes          |
| idasanutlin                     | yes       | yes       | yes          |
| navitoclax                      | yes       | yes       | yes          |
| panobinostat                    | yes       | yes       | yes          |
| selinexor                       | yes       | yes       | yes          |
| staurosporine_drug <sup>1</sup> | yes       | yes       | yes          |
| topotecan                       | yes       | yes       | yes          |
| vincristine                     | yes       | yes       | yes          |
| vorinostat                      | yes       | yes       | yes          |
| cobimetinib                     | yes       | yes       | no           |
| trametinib                      | yes       | yes       | no           |
| rapamycin (sirolimus)           | no        | yes       | yes          |
| temsirolimus                    | no        | yes       | yes          |
| vinorelbine                     | no        | yes       | yes          |
| crizotinib                      | yes       | no        | yes          |
| daunorubicin                    | yes       | no        | yes          |
| entinostat                      | yes       | no        | yes          |
| doxorubicin                     | yes       | no        | no           |

|              |     |     |     |
|--------------|-----|-----|-----|
| imatinib     | yes | no  | no  |
| ponatinib    | yes | no  | no  |
| thioguanine  | yes | no  | no  |
| cytarabine   | no  | yes | no  |
| gemcitabine  | no  | yes | no  |
| mitoxantrone | no  | yes | no  |
| paclitaxel   | no  | yes | no  |
| ceritinib    | no  | no  | yes |
| vinblastine  | no  | no  | yes |
| volasertib   | no  | no  | yes |

<sup>1</sup> assay control

All drugs detected in at least one of the culture models of the neuroblastoma tumor sample INF\_R\_359\_r3 as a TOP25 hit are listed in **Table S3**. For each model it is noted, whether the drug was within the TOP25 hits (yes) or not (no). For the INF\_R\_359\_r3-derived models, 21 drugs overlapped in all three models.

**Table S3. TOP25 Drug Hits for INF\_R\_359\_r3**

| Drug name                       | TOP25 FTC | TOP25 LTC | TOP25 mPDX-C |
|---------------------------------|-----------|-----------|--------------|
| AMG-232                         | yes       | yes       | yes          |
| navitoclax                      | yes       | yes       | yes          |
| vinorelbine                     | yes       | yes       | yes          |
| bortezomib                      | yes       | yes       | yes          |
| topotecan                       | yes       | yes       | yes          |
| idasanutlin                     | yes       | yes       | yes          |
| talazoparib                     | yes       | yes       | yes          |
| selinexor                       | yes       | yes       | yes          |
| mitoxantrone                    | yes       | yes       | yes          |
| etoposide                       | yes       | yes       | yes          |
| A-1155463                       | yes       | yes       | yes          |
| paclitaxel                      | yes       | yes       | yes          |
| daunorubicin                    | yes       | yes       | yes          |
| doxorubicin                     | yes       | yes       | yes          |
| staurosporine_drug <sup>1</sup> | yes       | yes       | yes          |
| A-1210477                       | yes       | yes       | yes          |
| gemcitabine                     | yes       | yes       | yes          |
| vincristine                     | yes       | yes       | yes          |
| cytarabine                      | yes       | yes       | yes          |
| ceritinib                       | yes       | yes       | yes          |
| panobinostat                    | yes       | yes       | yes          |
| dactinomycin                    | yes       | yes       | no           |
| irinotecan                      | yes       | yes       | no           |
| A-1331852                       | no        | yes       | yes          |
| cisplatin                       | yes       | no        | yes          |
| ponatinib                       | yes       | no        | yes          |
| volasertib                      | no        | yes       | no           |
| dasatinib                       | no        | no        | yes          |

<sup>1</sup> assay control

The comparison of the DNA methylation profile and copy number variations of the neuroblastoma tumor sample INF\_R\_359\_r3 is depicted in **Figure S1**.

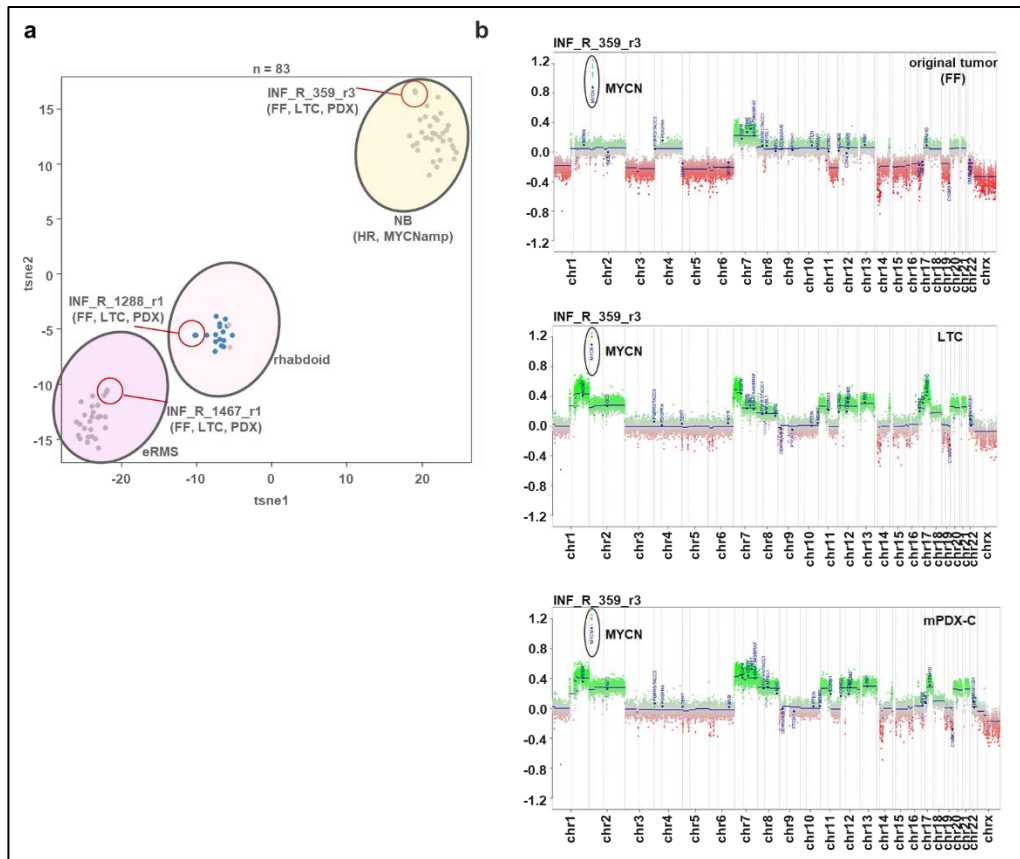

**Figure S1: Comparison of the original tumor with matched culture models.** (a) t-SNE analysis of DNA methylation profiles for comparison of the original tumors and their tumor-derived culture models LTC and mPDX-C with already existing well-characterized reference tumors (rhabdoid tumors; eRMS tumors and high-risk MYCNamp neuroblastomas). (b) Copy-number profiles of the original neuroblastoma tumor INF\_R\_359\_r3, and its LTC and mPDX-C models reveal similar genome-wide methylation patterns and recurrent *MYCN* amplification, characteristic for high-risk neuroblastomas. FF: fresh frozen material of the original tumor; LTC: long-term culture; mPDX-C: mouse-PDX-derived culture; NB: neuroblastoma; HR: high-risk.

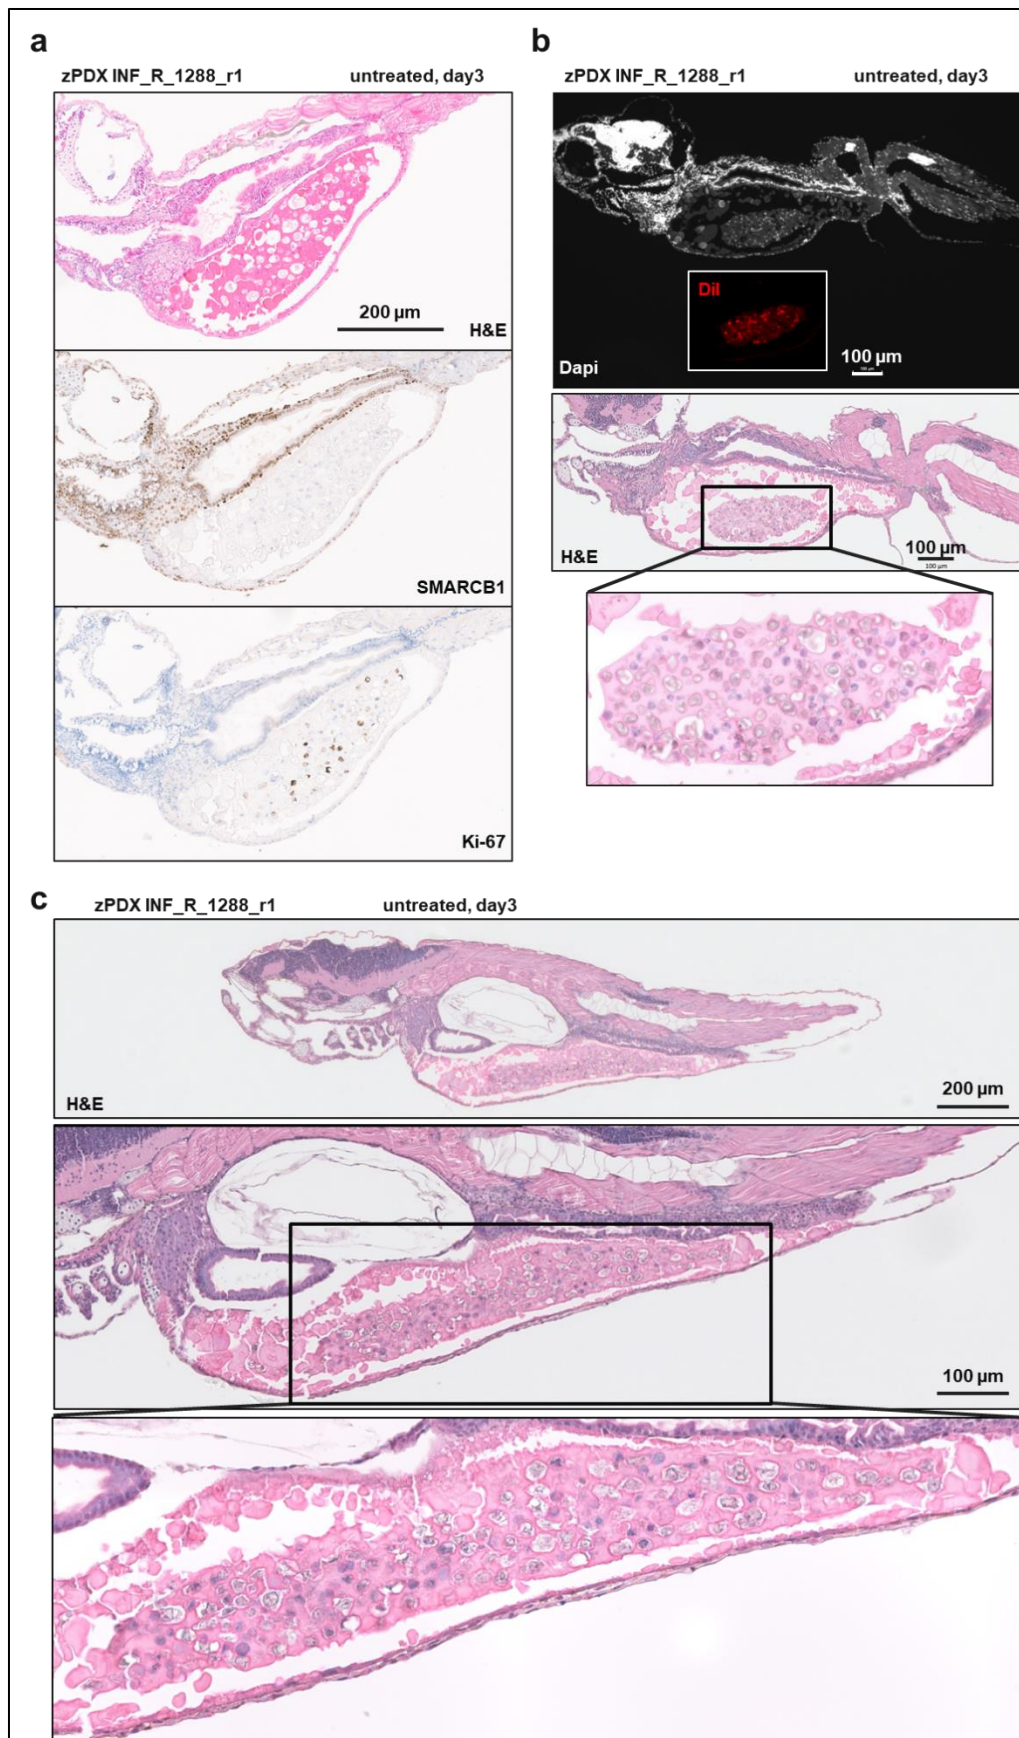

**Figure S2: Representative images of immunohistochemistry (IHC) staining.** (a) Zebrafish early larvae engrafted with INF\_R\_1288\_r1 cells (3 days post implantation) were stained with H&E, with  $\alpha$ -SMARCB1, confirming SMARCB1 deletion in engrafted human tumor cells, and with Ki-67 for the detection of mitotic cells. Scale bar = 200  $\mu$ m. (b) Zebrafish early larvae engrafted with INF\_R\_1288\_r1 cells (3 days post implantation) were stained with DAPI and H&E. Scale bar: 100  $\mu$ m. (c) H&E staining of

zebrafish early larvae engrafted with INF\_R\_1288\_r1 cells (3 days post implantation). Scale bar upper panel: 200  $\mu$ m, middle panel: 100 $\mu$ m.

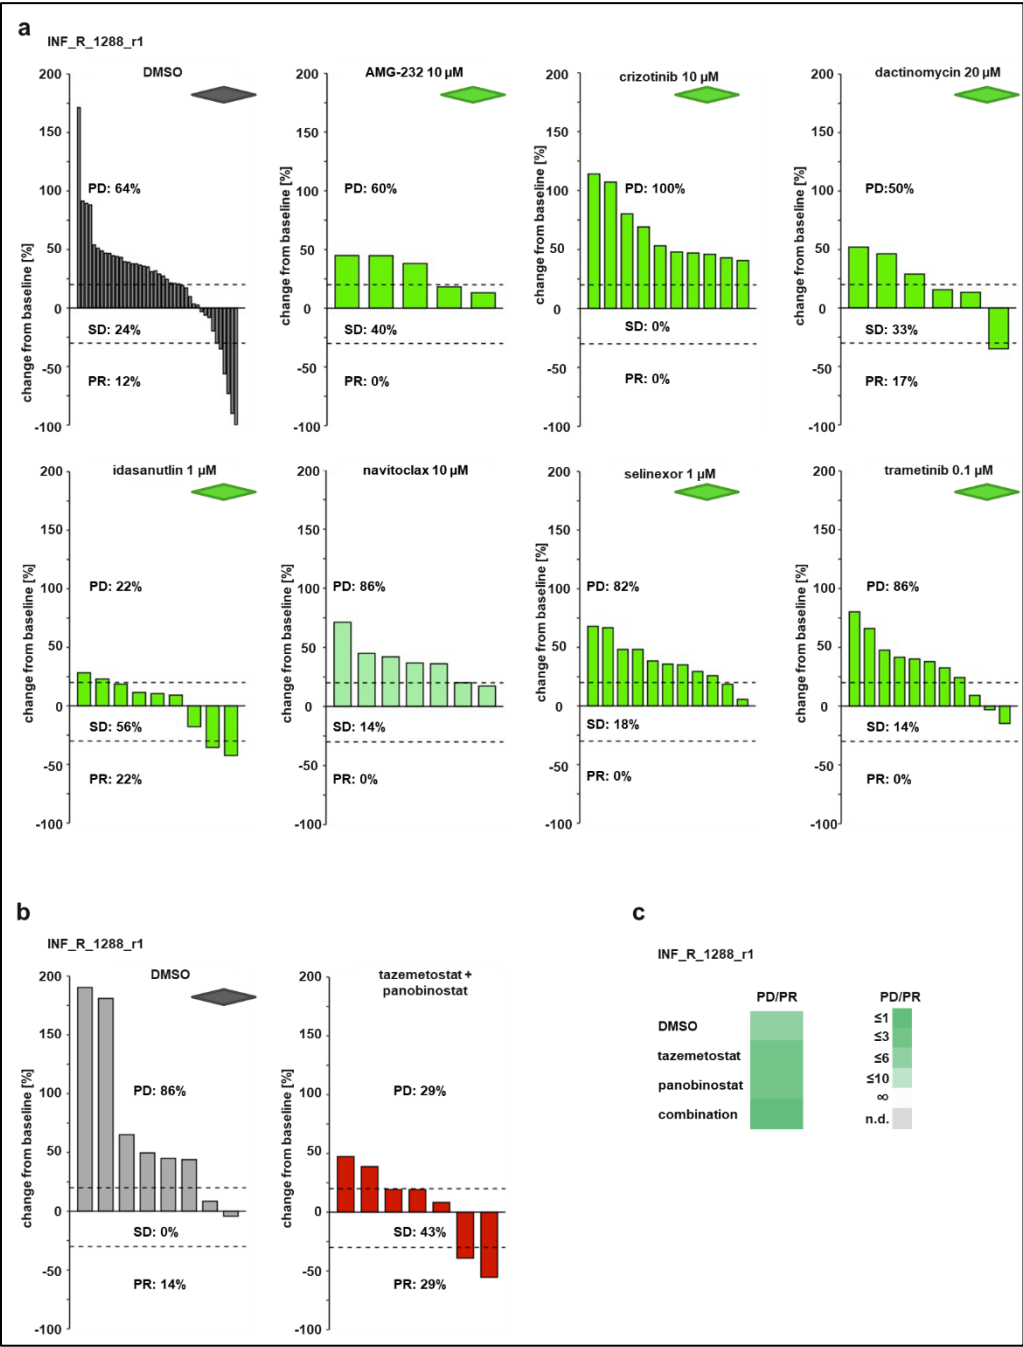

**Figure S3: Waterfall plots demonstrating change in tumor volume for the INF\_R\_1288\_r1 rhabdoid tumor zPDX model. (a–b)** Depicted is the change in tumor volume [%] for each individual zebrafish early larvae engrafted with tumor cells, from baseline (day 1 = start of the treatment) to day 3 after tumor implantation. Numbers indicate the percentage of early larvae with progressive disease (PD), stable disease (SD) and partial response (PR) in each treatment group on day 3. **(c)** Heatmap reflecting the ratio of PD to PR (green shading). PD: progressive disease, tumor volume must have increased at least 20%; PR: partial response, tumor volume must have decreased by more than 30%. n.d.: not detected;  $\infty$ : the percentage of PR was 0%.

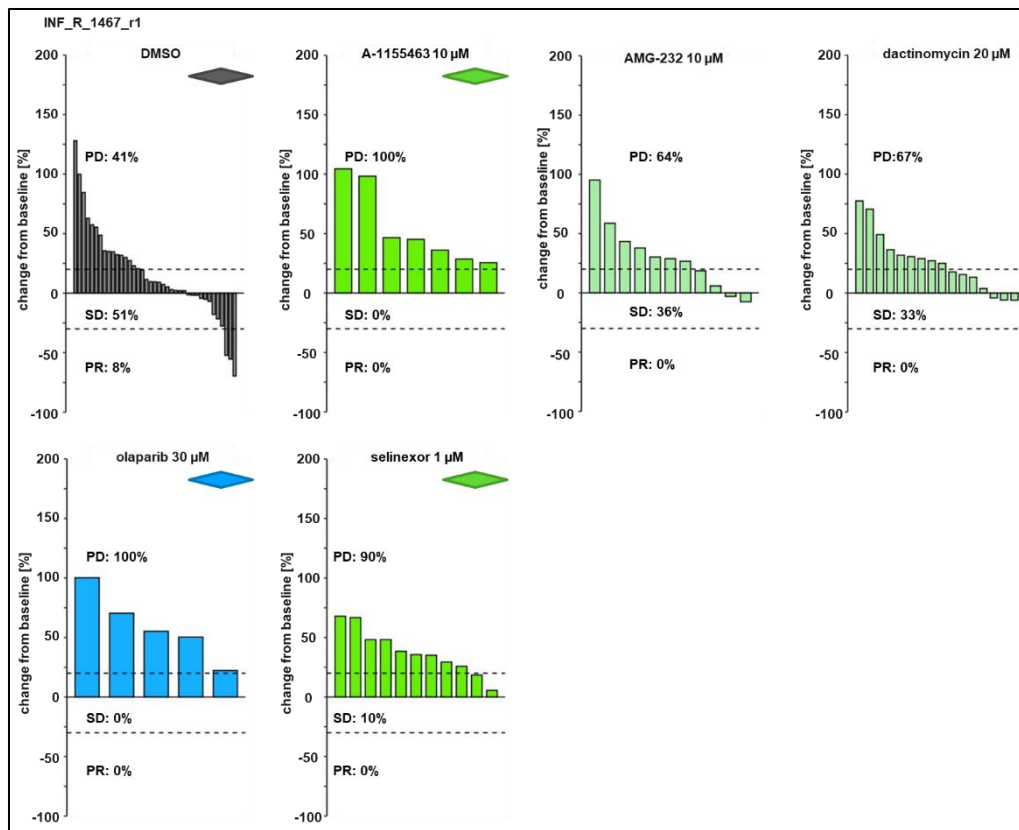

**Figure S4: Waterfall plots demonstrating change in tumor volume for the INF\_R\_1467\_r1 eRMS zPDX model.** Depicted is the change in tumor volume [%] for each individual zebrafish early larvae engrafted with tumor cells, from baseline (day 1 = start of the treatment) to day 3 after tumor implantation. Numbers indicate the percentage of early larvae with progressive disease (PD), stable disease (SD) and partial response (PR) in each treatment group on day 3.

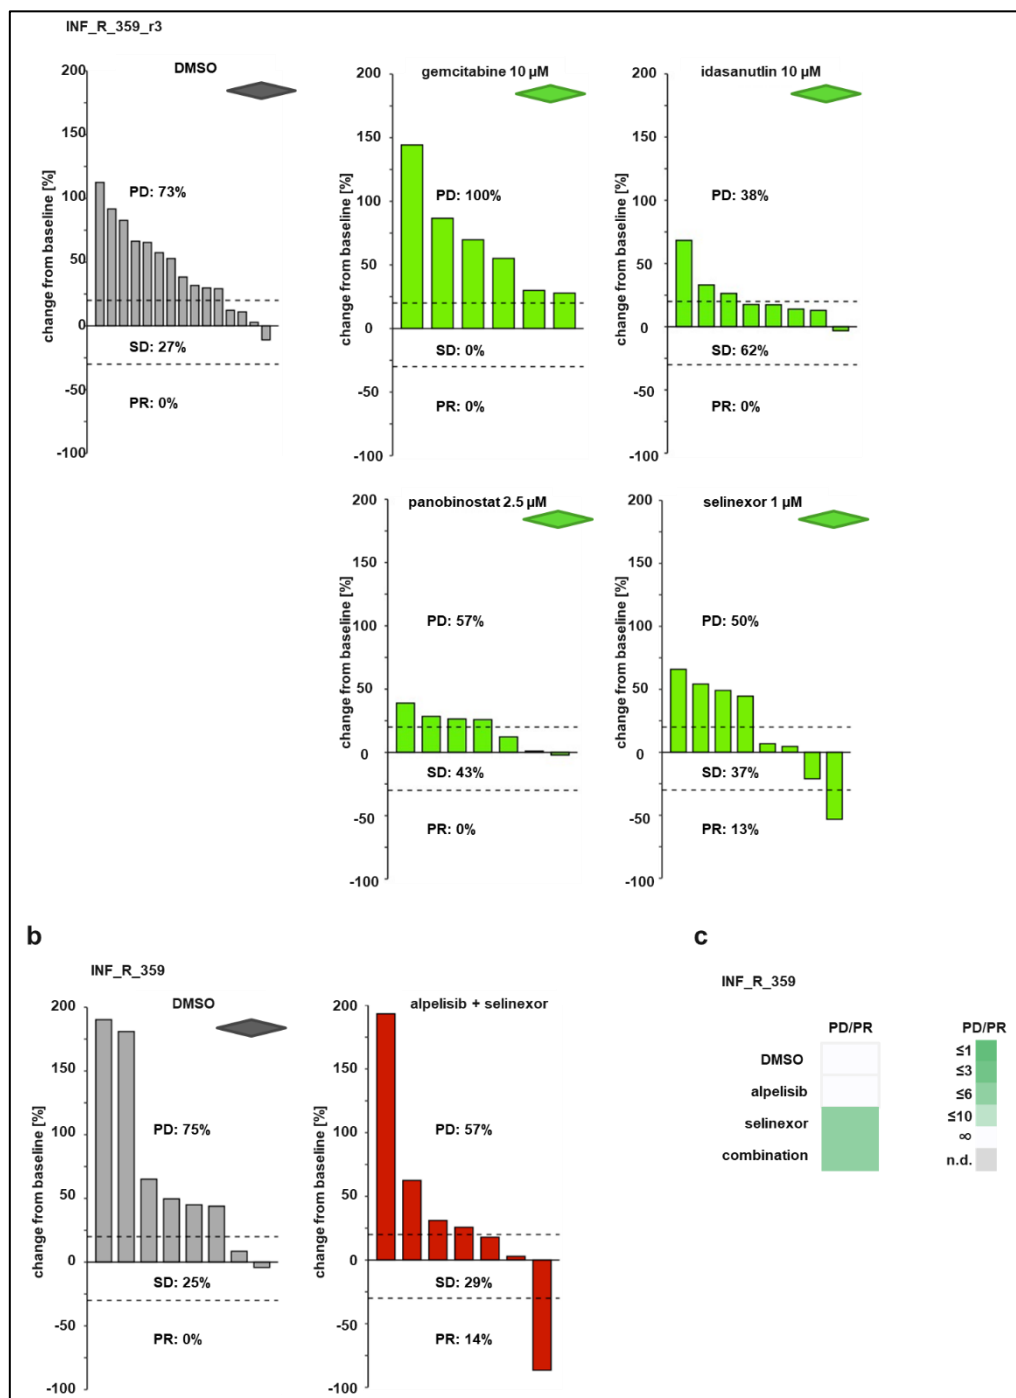

**Figure S5: Waterfall plots demonstrating change in tumor volume for the INF\_R\_359\_r3 neuroblastoma zPDX model. a-b)** Depicted is the change in tumor volume [%] for each individual zebrafish early larvae engrafted with tumor cells, from baseline (day 1 = start of the treatment) to day 3 after tumor implantation. Numbers indicate the percentage of early larvae with progressive disease (PD), stable disease (SD) and partial response (PR) in each treatment group on day 3. **(c)** Heatmap reflecting the ratio of PD to PR (green shading). PD: progressive disease, tumor volume must have increased at least 20%; PR: partial response, tumor volume must have decreased by more than 30%. n.d.: not detected;  $\infty$ : the percentage of PR was 0%.
